# Supplementary material for: Differential proteomics highlights macrophage-specific responses to amorphous silica nanoparticles
Source: Royal Society of Chemistry journal article supplement (doi:10.1039/c7nr02140b), 2017-01-01
Supplement: c7nr02140b1.pdf [file c7nr02140b1.pdf]

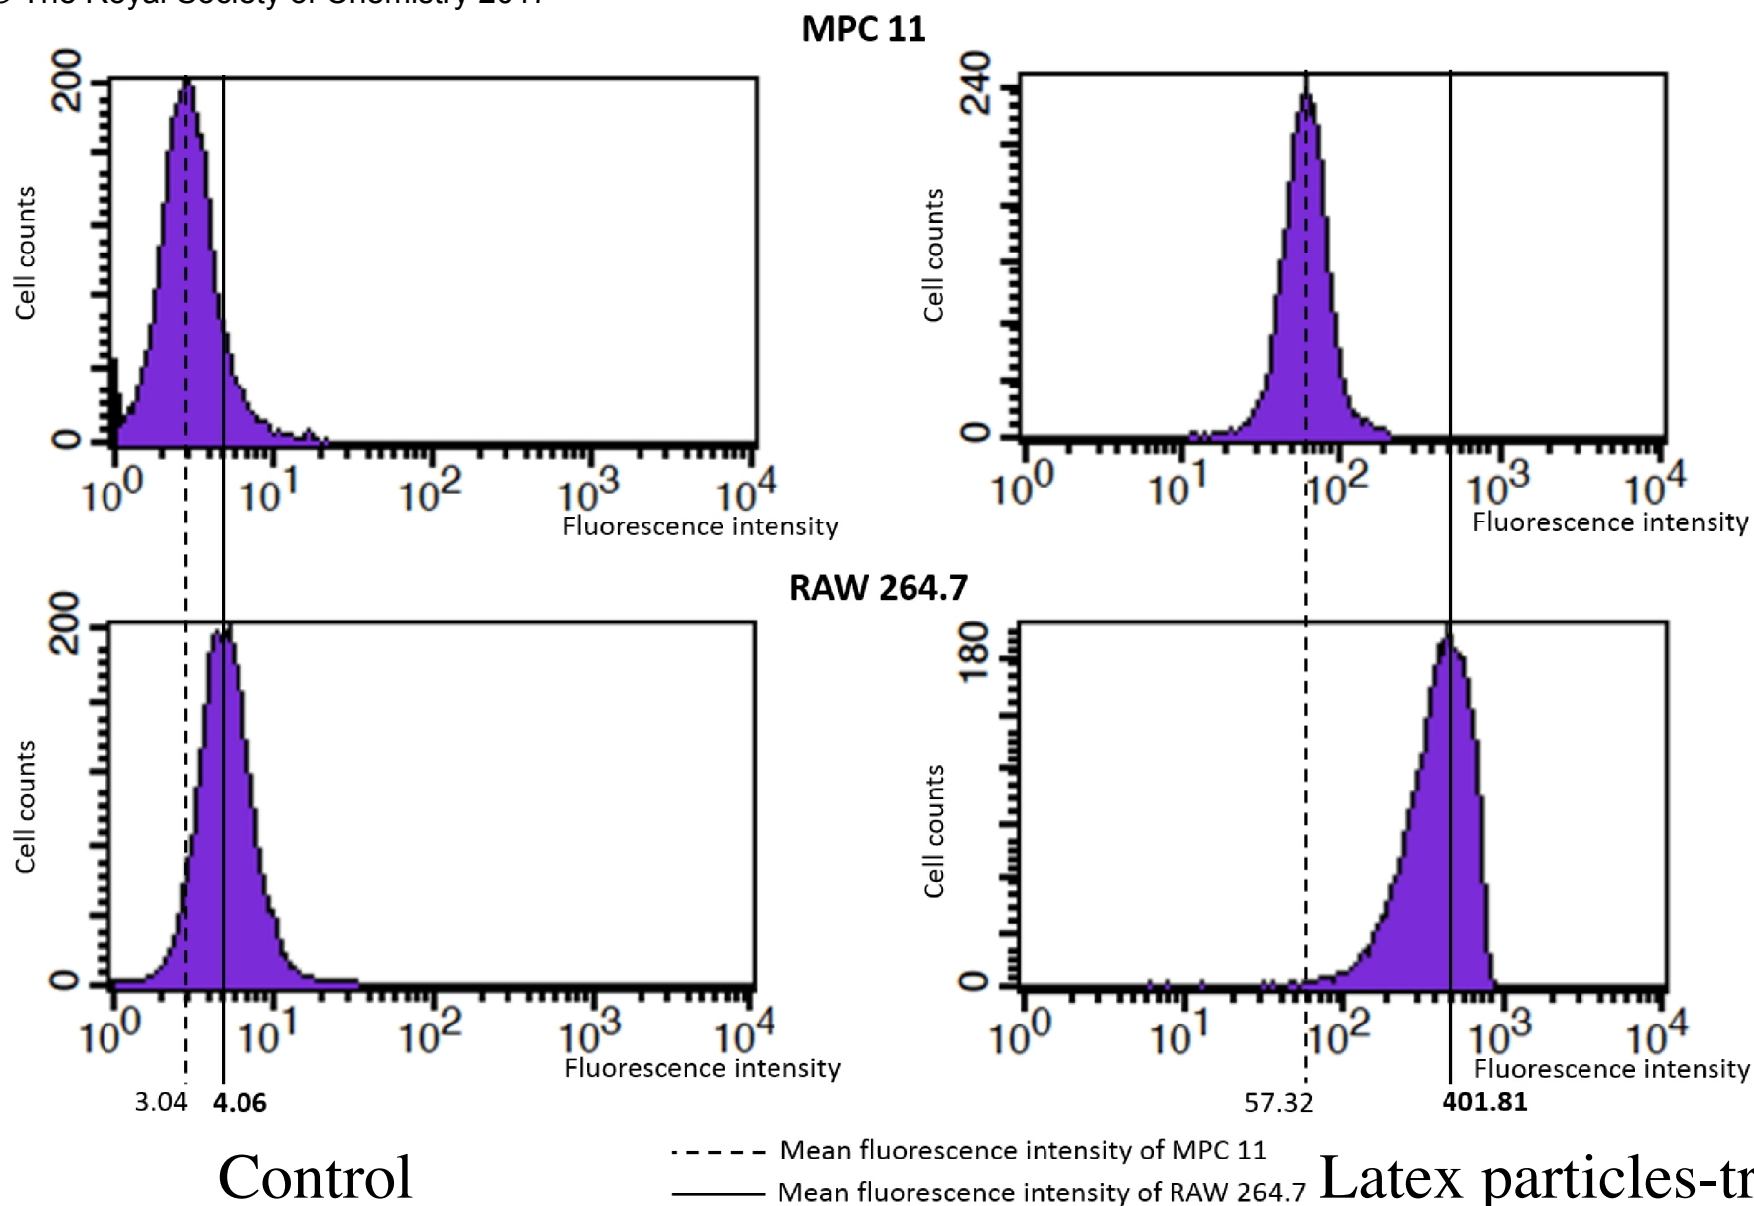

### Supplementary Figure 1: Particle internalization assay

RAW264.7 and MPC11 cells were treated for 24 hours with 50 $\mu$ g/ml fluorescent latex particles. After cell harvesting and washing, the cells were analyzed by flow cytometry. The data show the mean intensity of cell fluorescence for a representative experiment.

Left column: control cells (untreated with particles)

Right column: particles-treated cells
