# Supplementary material for: Differential proteomics highlights macrophage-specific responses to amorphous silica nanoparticles
Source: Royal Society of Chemistry journal article supplement (doi:10.1039/c7nr02140b), 2017-01-01
Supplement: c7nr02140b2.pdf [file c7nr02140b2.pdf]

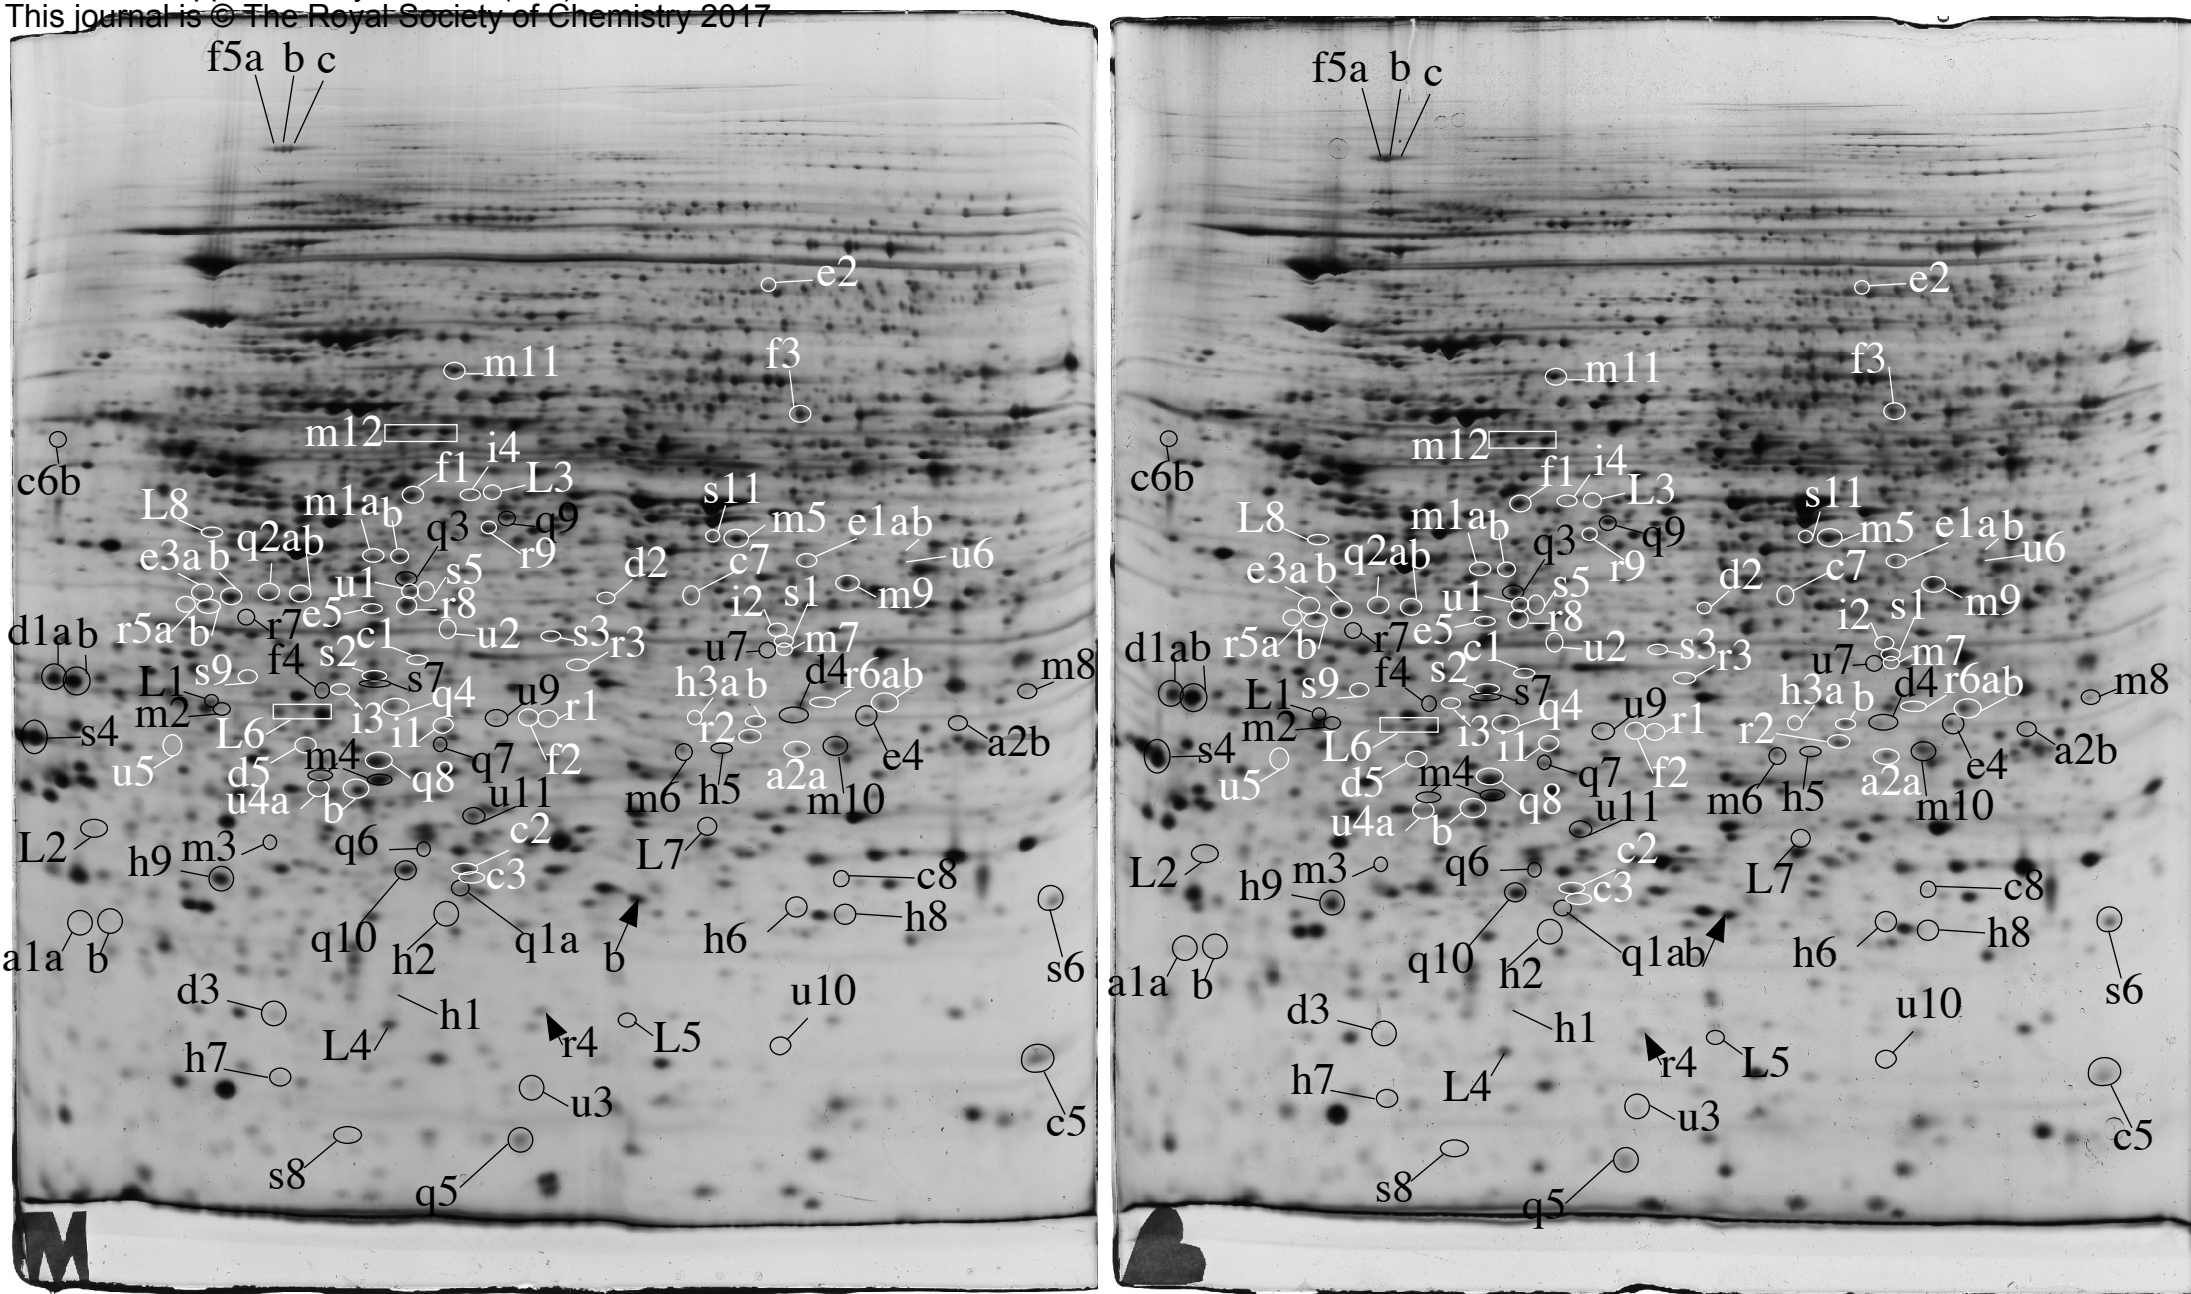

## Silica treated

### Supplementary Figure 2: Proteomic analysis of total cell extracts by 2D electrophoresis

Total cell extracts of MPC11 cells were separated by two-dimensional gel electrophoresis. Experimental parameters identical to Figure 2

A: gel obtained from control cells.

B: gel obtained from cells treated for 24 hours with 100 $\mu$ g/ml Ludox TMA
