# Supplementary material for: Differential proteomics highlights macrophage-specific responses to amorphous silica nanoparticles
Source: Royal Society of Chemistry journal article supplement (doi:10.1039/c7nr02140b), 2017-01-01
Supplement: c7nr02140b6.pdf [file c7nr02140b6.pdf]

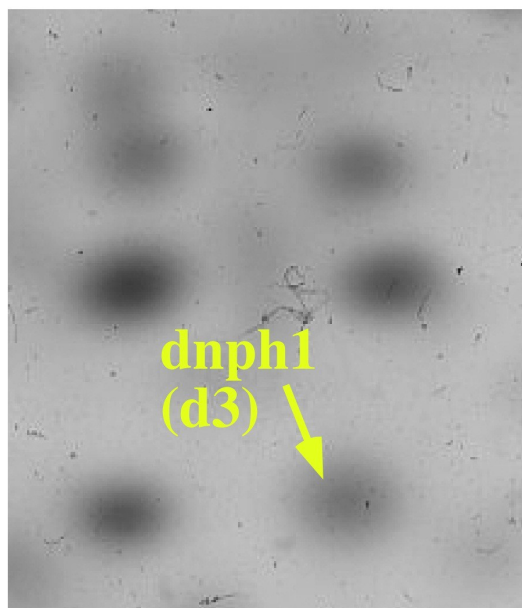

ctrl

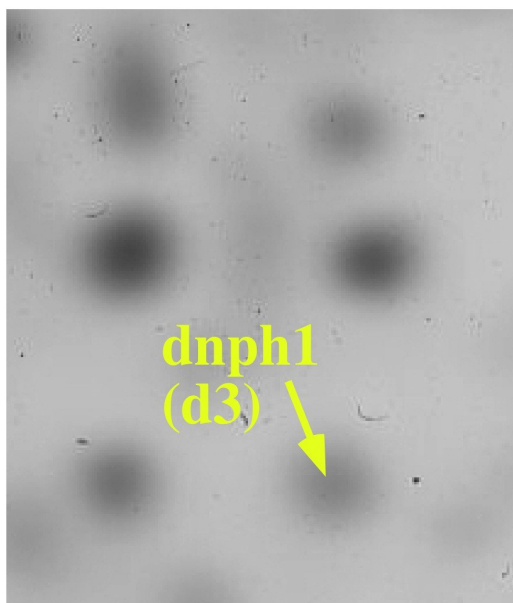

silica 10 $\mu$ g/ml

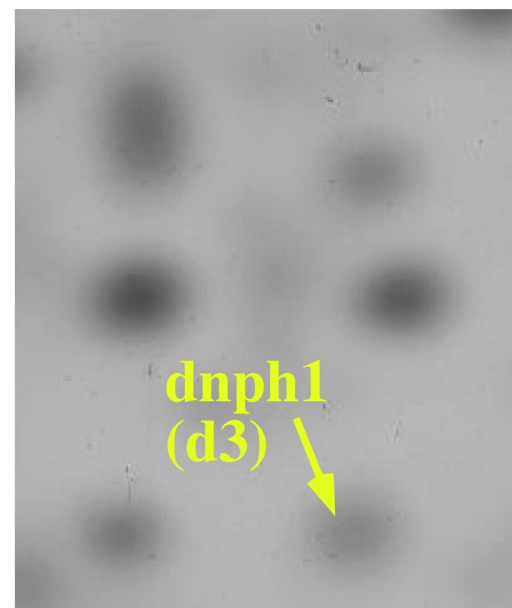

silica 20 $\mu$ g/ml

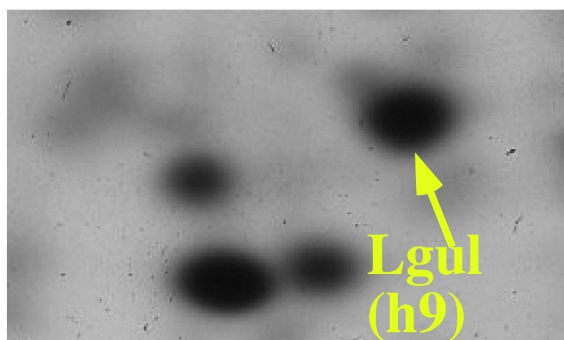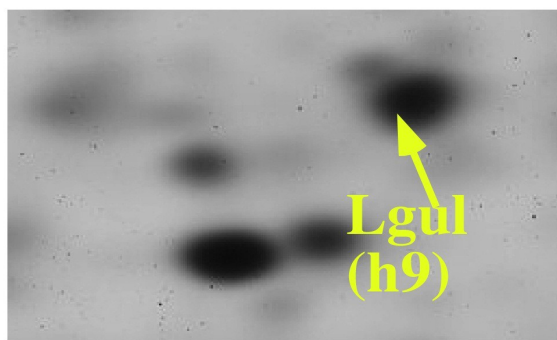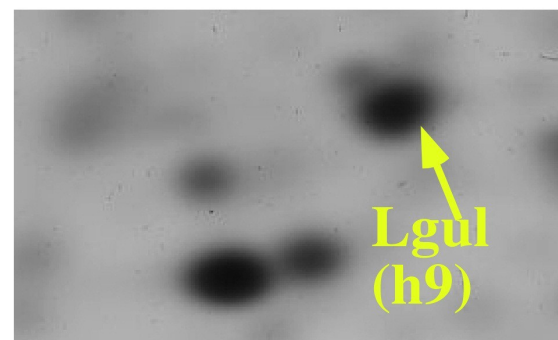

**Supplementary Figure 6** : detail of the 2D gels (RAW264.7 cells) with highlighted spots part 4
