# Supplementary material for: Differential proteomics highlights macrophage-specific responses to amorphous silica nanoparticles
Source: Royal Society of Chemistry journal article supplement (doi:10.1039/c7nr02140b), 2017-01-01
Supplement: c7nr02140b11.pdf [file c7nr02140b11.pdf]

Supplementary Table 2. Primer sequences used for the RT-qPCR experiments

|       | Forward              | Reverse              |
|-------|----------------------|----------------------|
| CSA   | AGGAAACAGTTTACAGTCAT | ACATCCCATAATTTTACTCT |
| CSB   | GGTTTCTCTGTATAGTCCAG | TAACCATGTTTACAGATTCA |
| XPF   | CTCAGAGAACACATAAGGAT | TGAACACATAAACAGCTAAC |
| PCNA  | AGAAAACAAACCTTTGAAG  | CAGTATTTGTAAAGCAGAAA |
| XRCC1 | CTCTCTTCTCAGTCGTATC  | ACTCAAGTCCAGTTTTCTC  |
| ERCC1 | CAGGAGGAAGTTTGTTATC  | CTATTAGACTTTGCTCCTGT |
